# Supplementary material for: Gastrointestinal Tract Stabilized Protein Delivery Using Disulfide Thermostable Exoshell System
Source: MDPI journal article supplement (doi:10.3390/ijms23179856), 2022-08-30
Supplement: s1 [file s1]

**a.**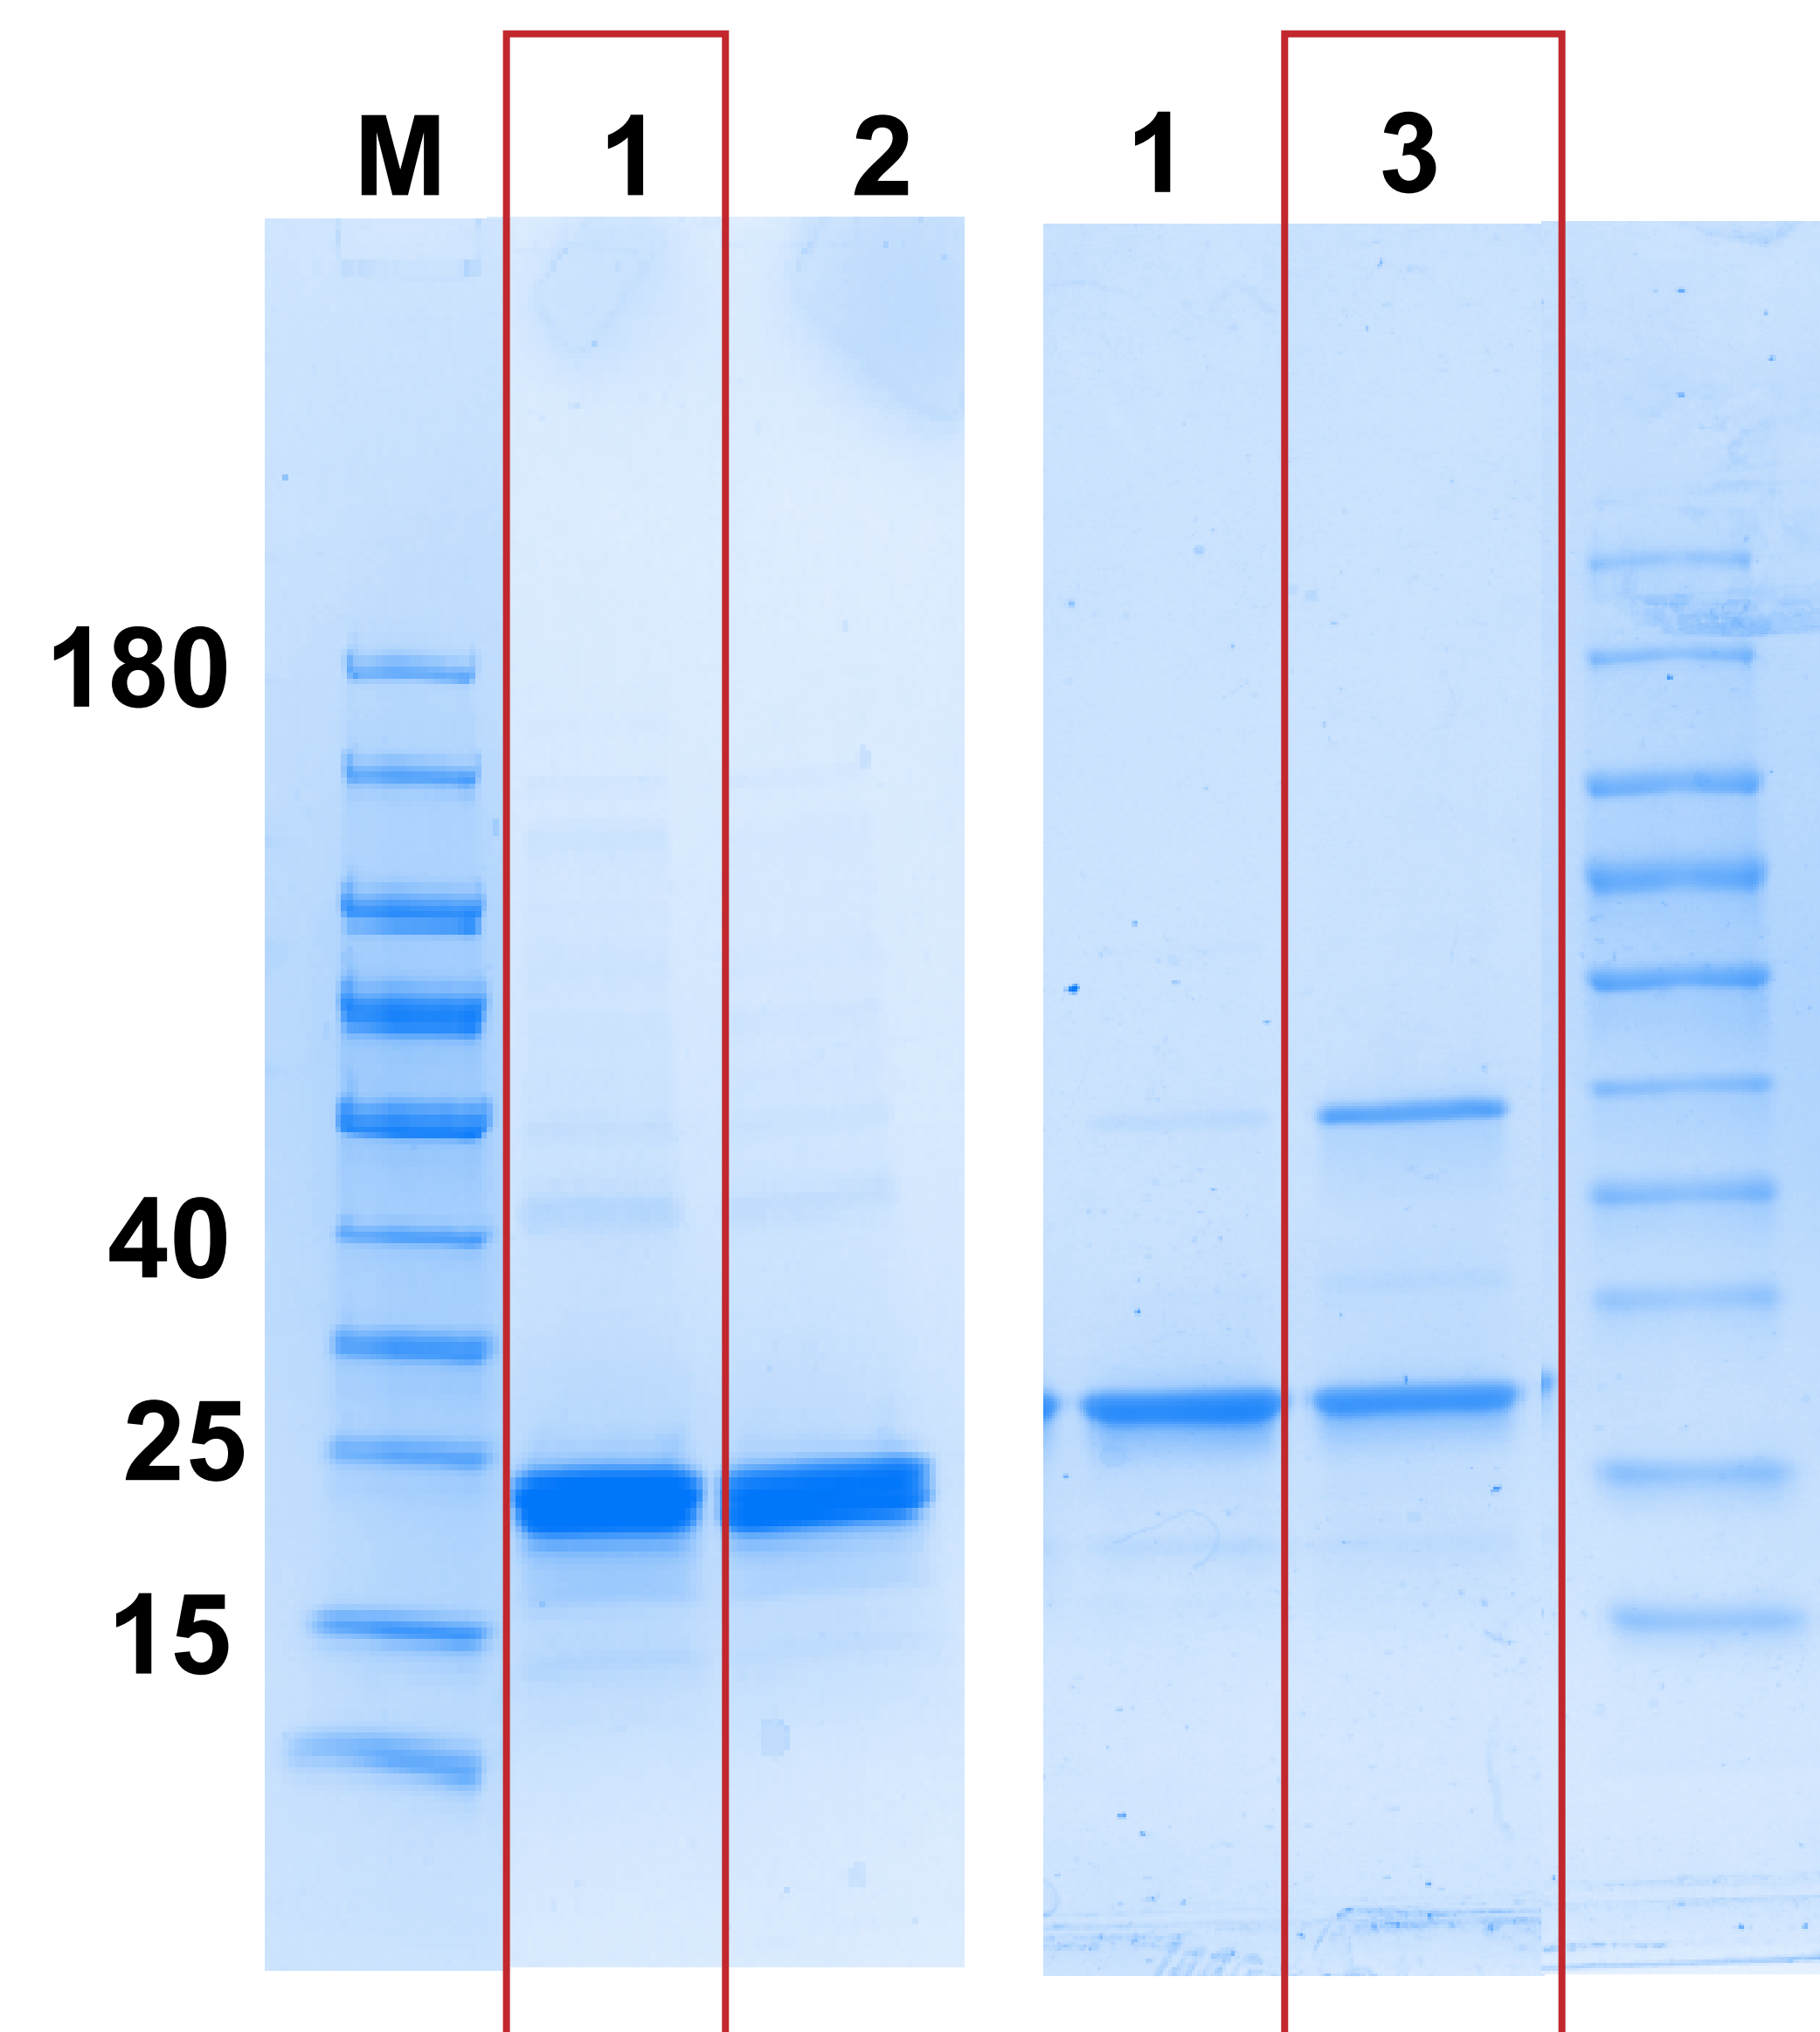**b.**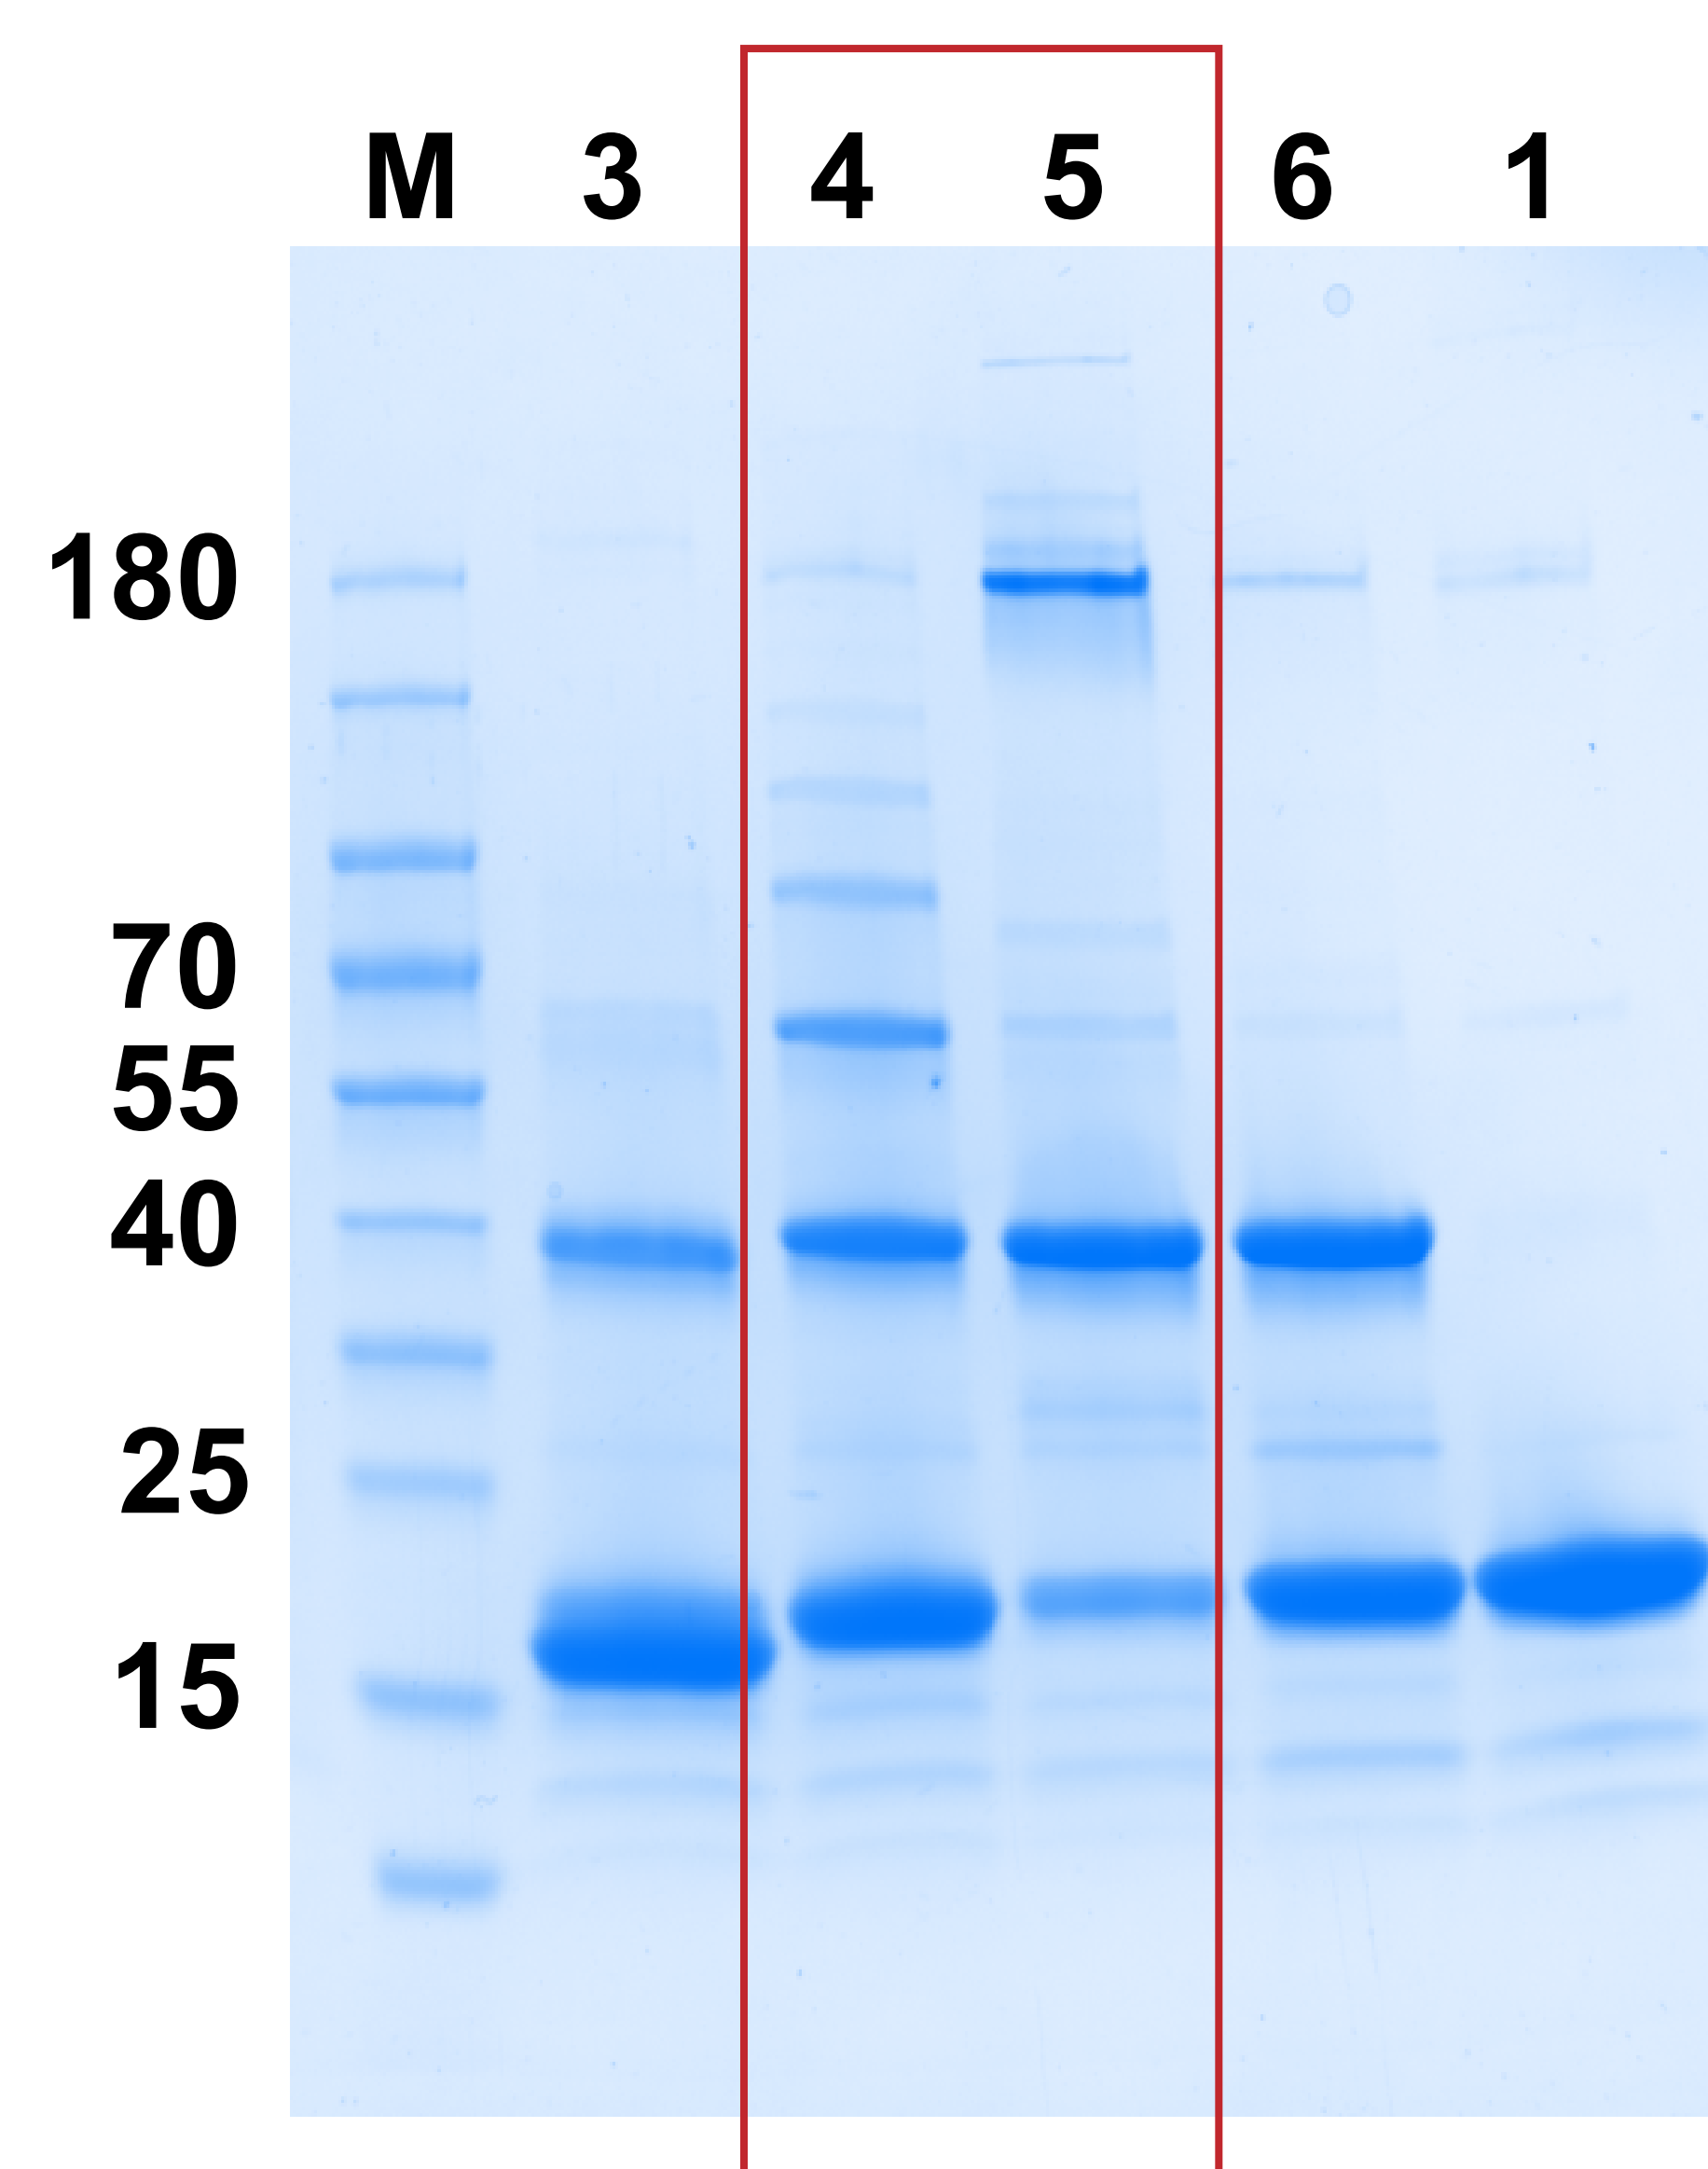**c.**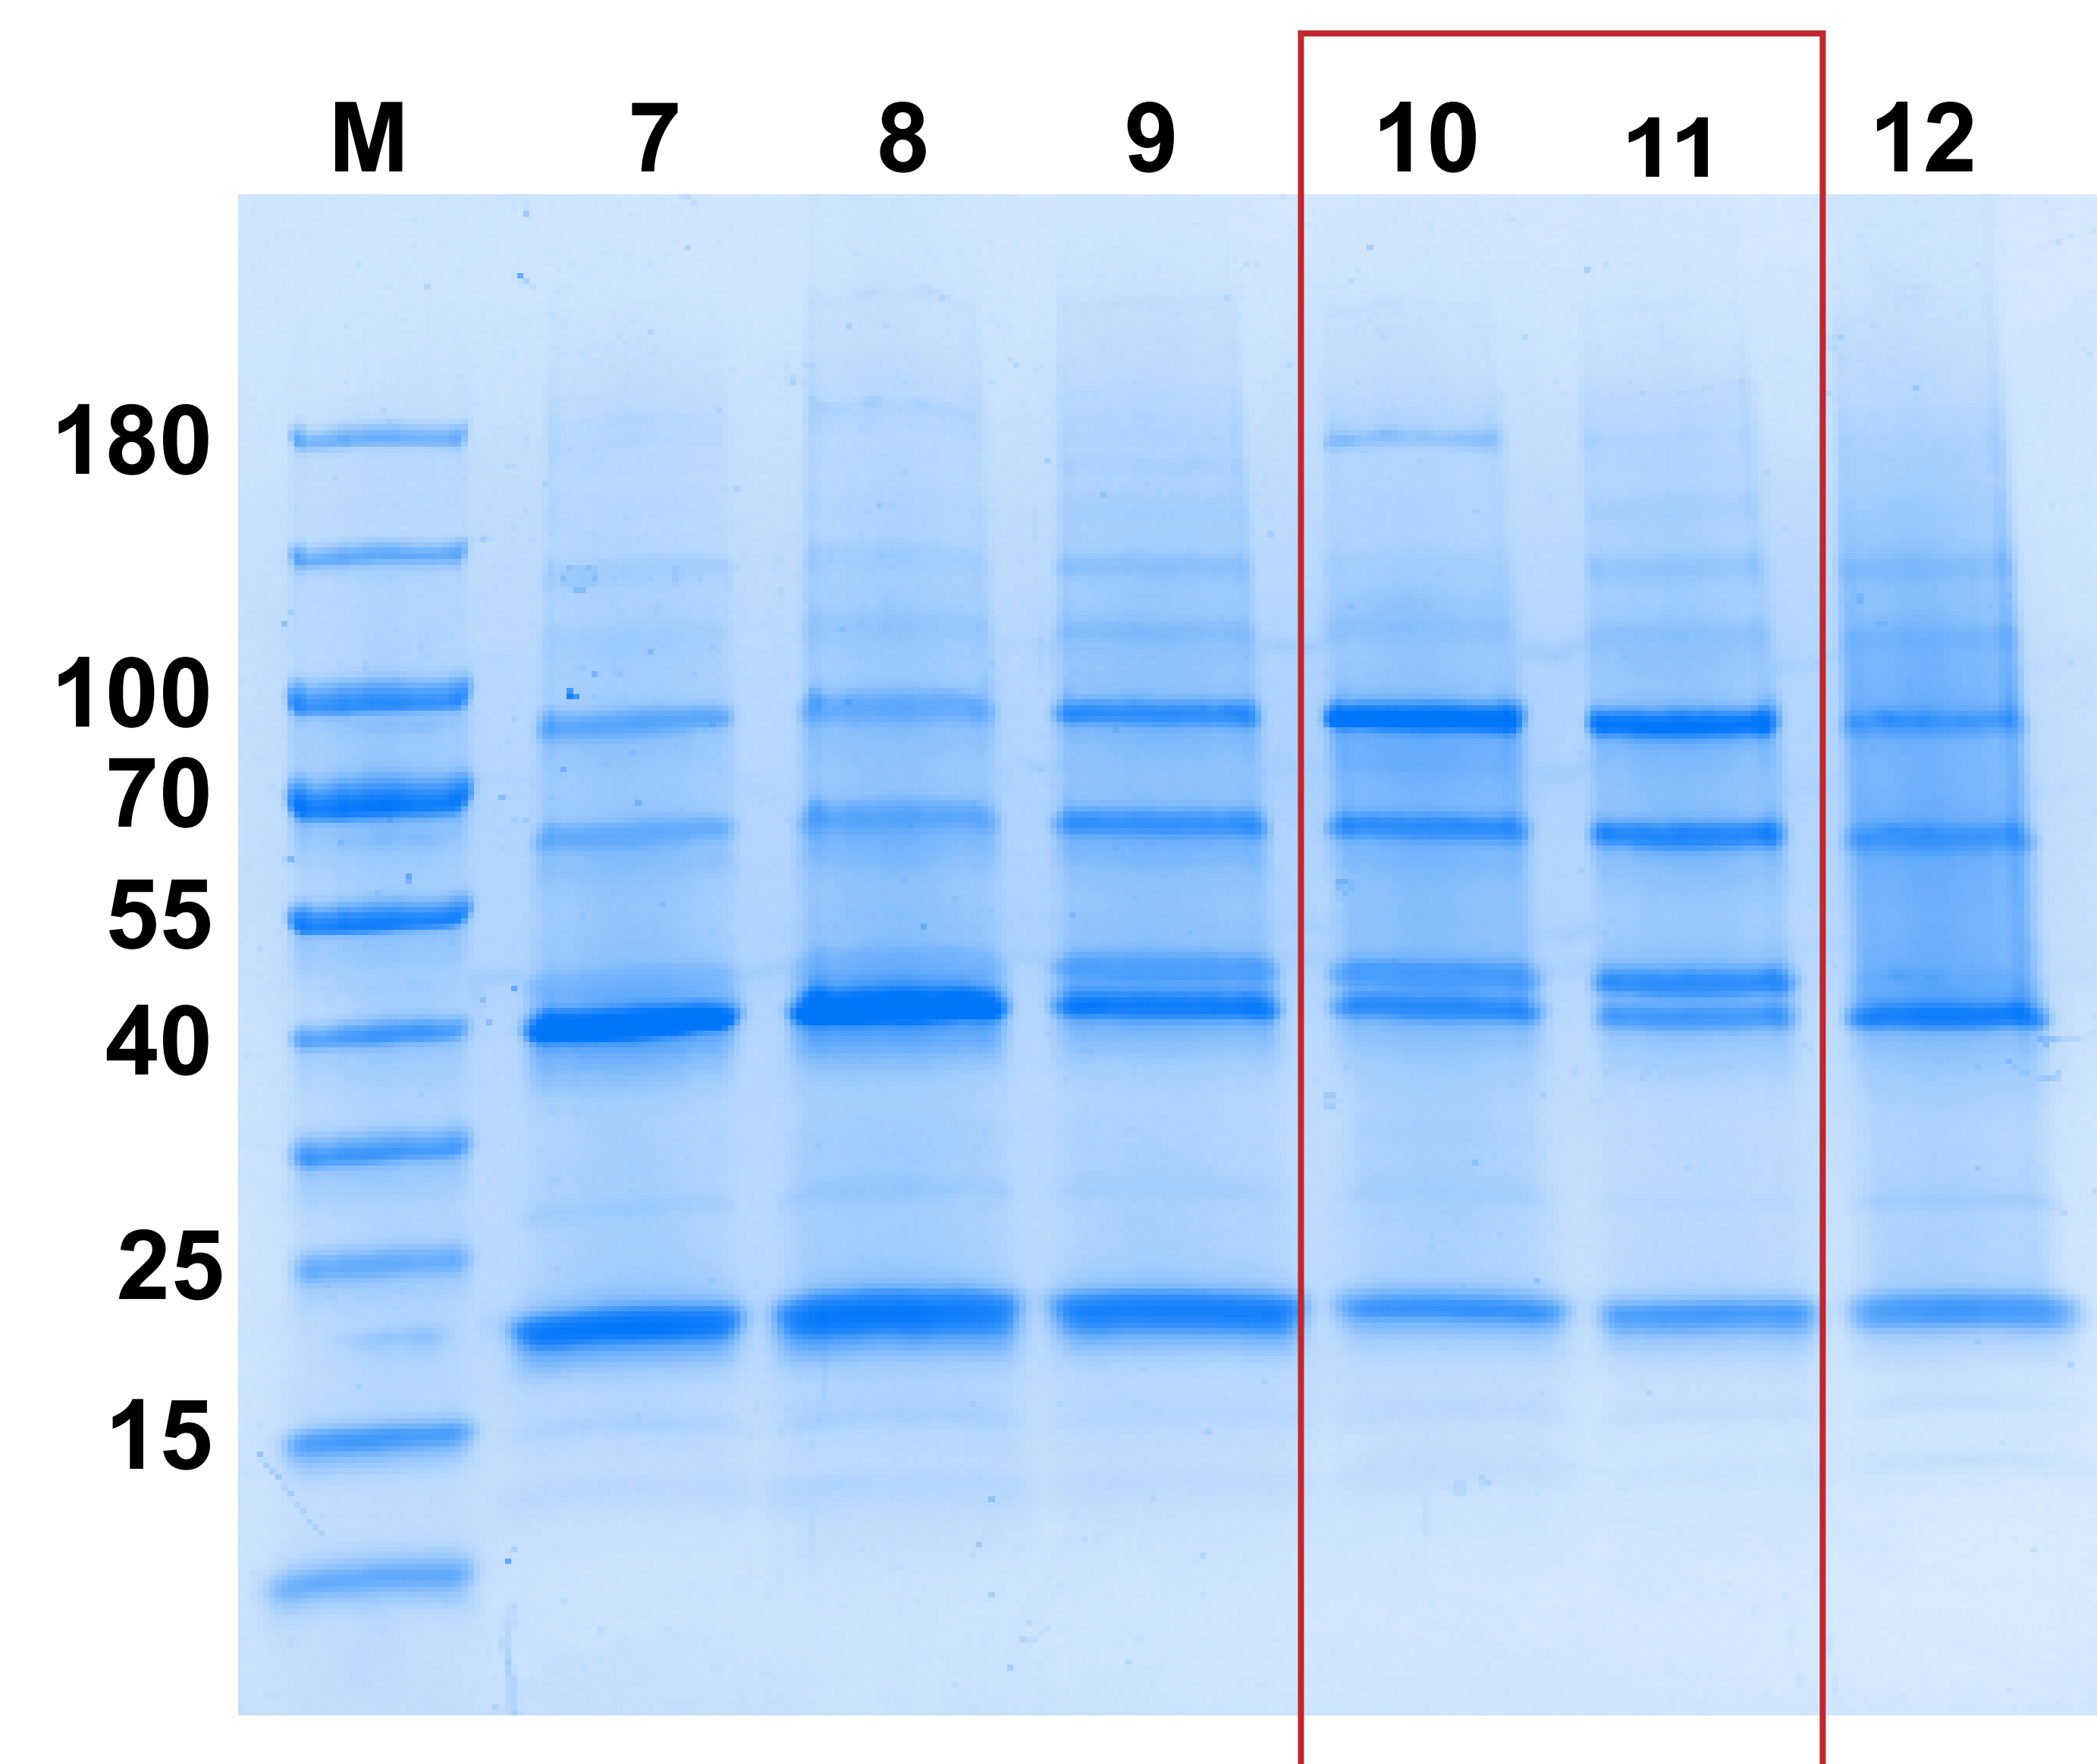**d.**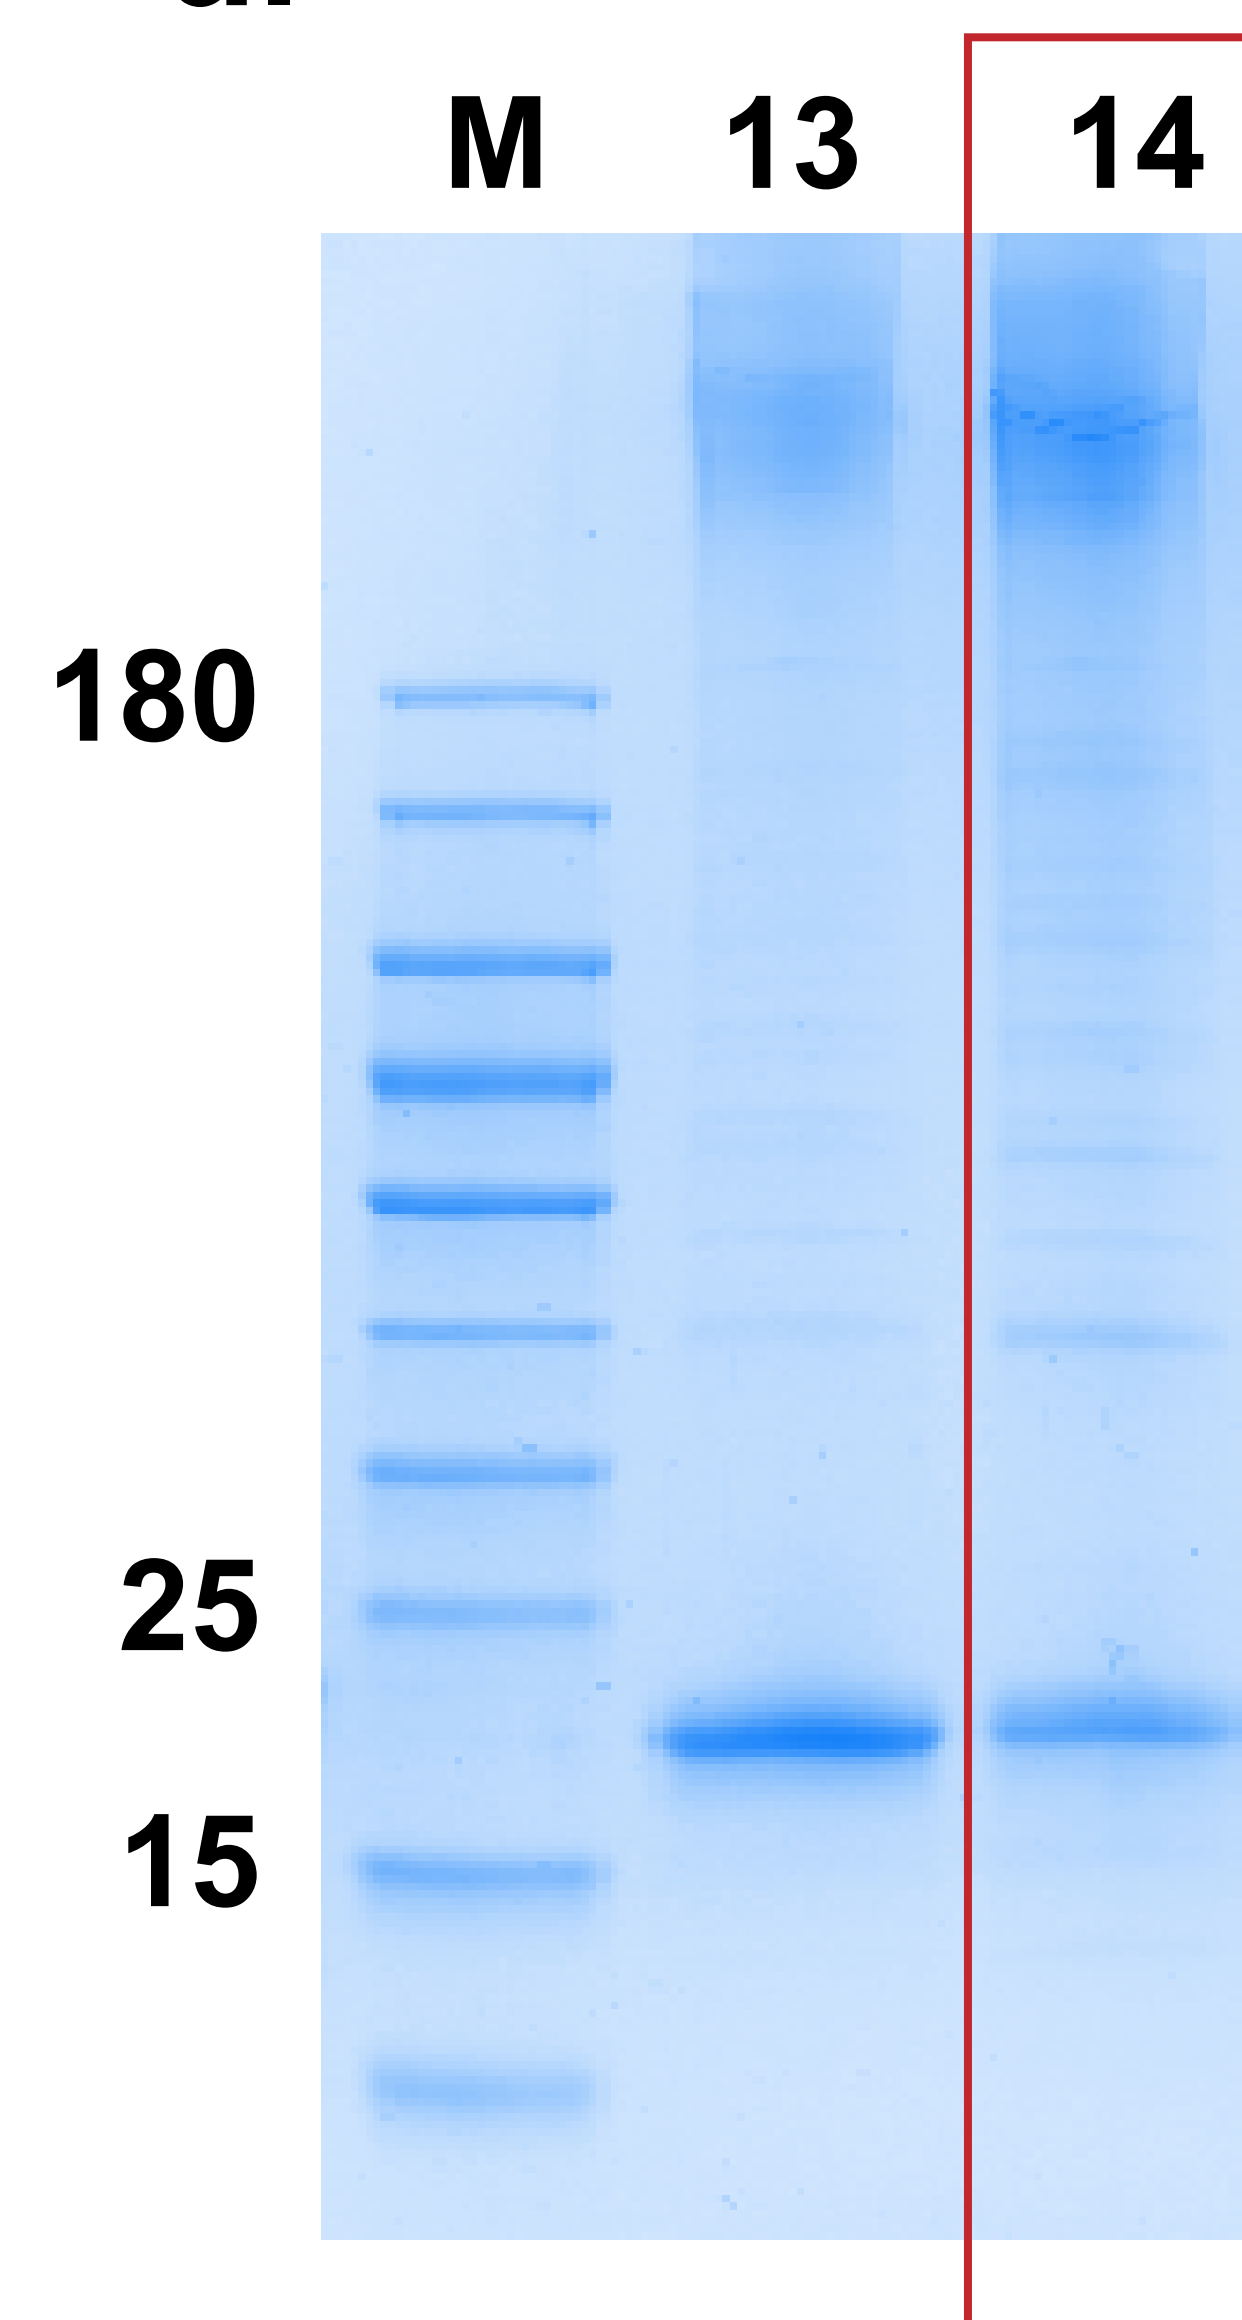

1. tES  
 2. tES R151C  
 3. tES A152C  
 4. tES A152C - L53C  
 5. tES A152C - A74C  
 6. tES A152C - G76C  
 7. tES A152C - R66C  
 M. Marker

8. tES A152C - L53C - R66C  
 9. tES A152C - A74C - R66C  
 10. tES A152C - G67C  
 11. tES A152C - L53C - G67C  
 12. tES A152C - A74C - G67C  
 13. tES A152C - G67C - A117C - G37C  
 14. tES A152C - L53C - G67C - A117C - G37C

**Figure S1. (a-d)** Non-reducing SDS-PAGE for designed cysteine residue substitutions.



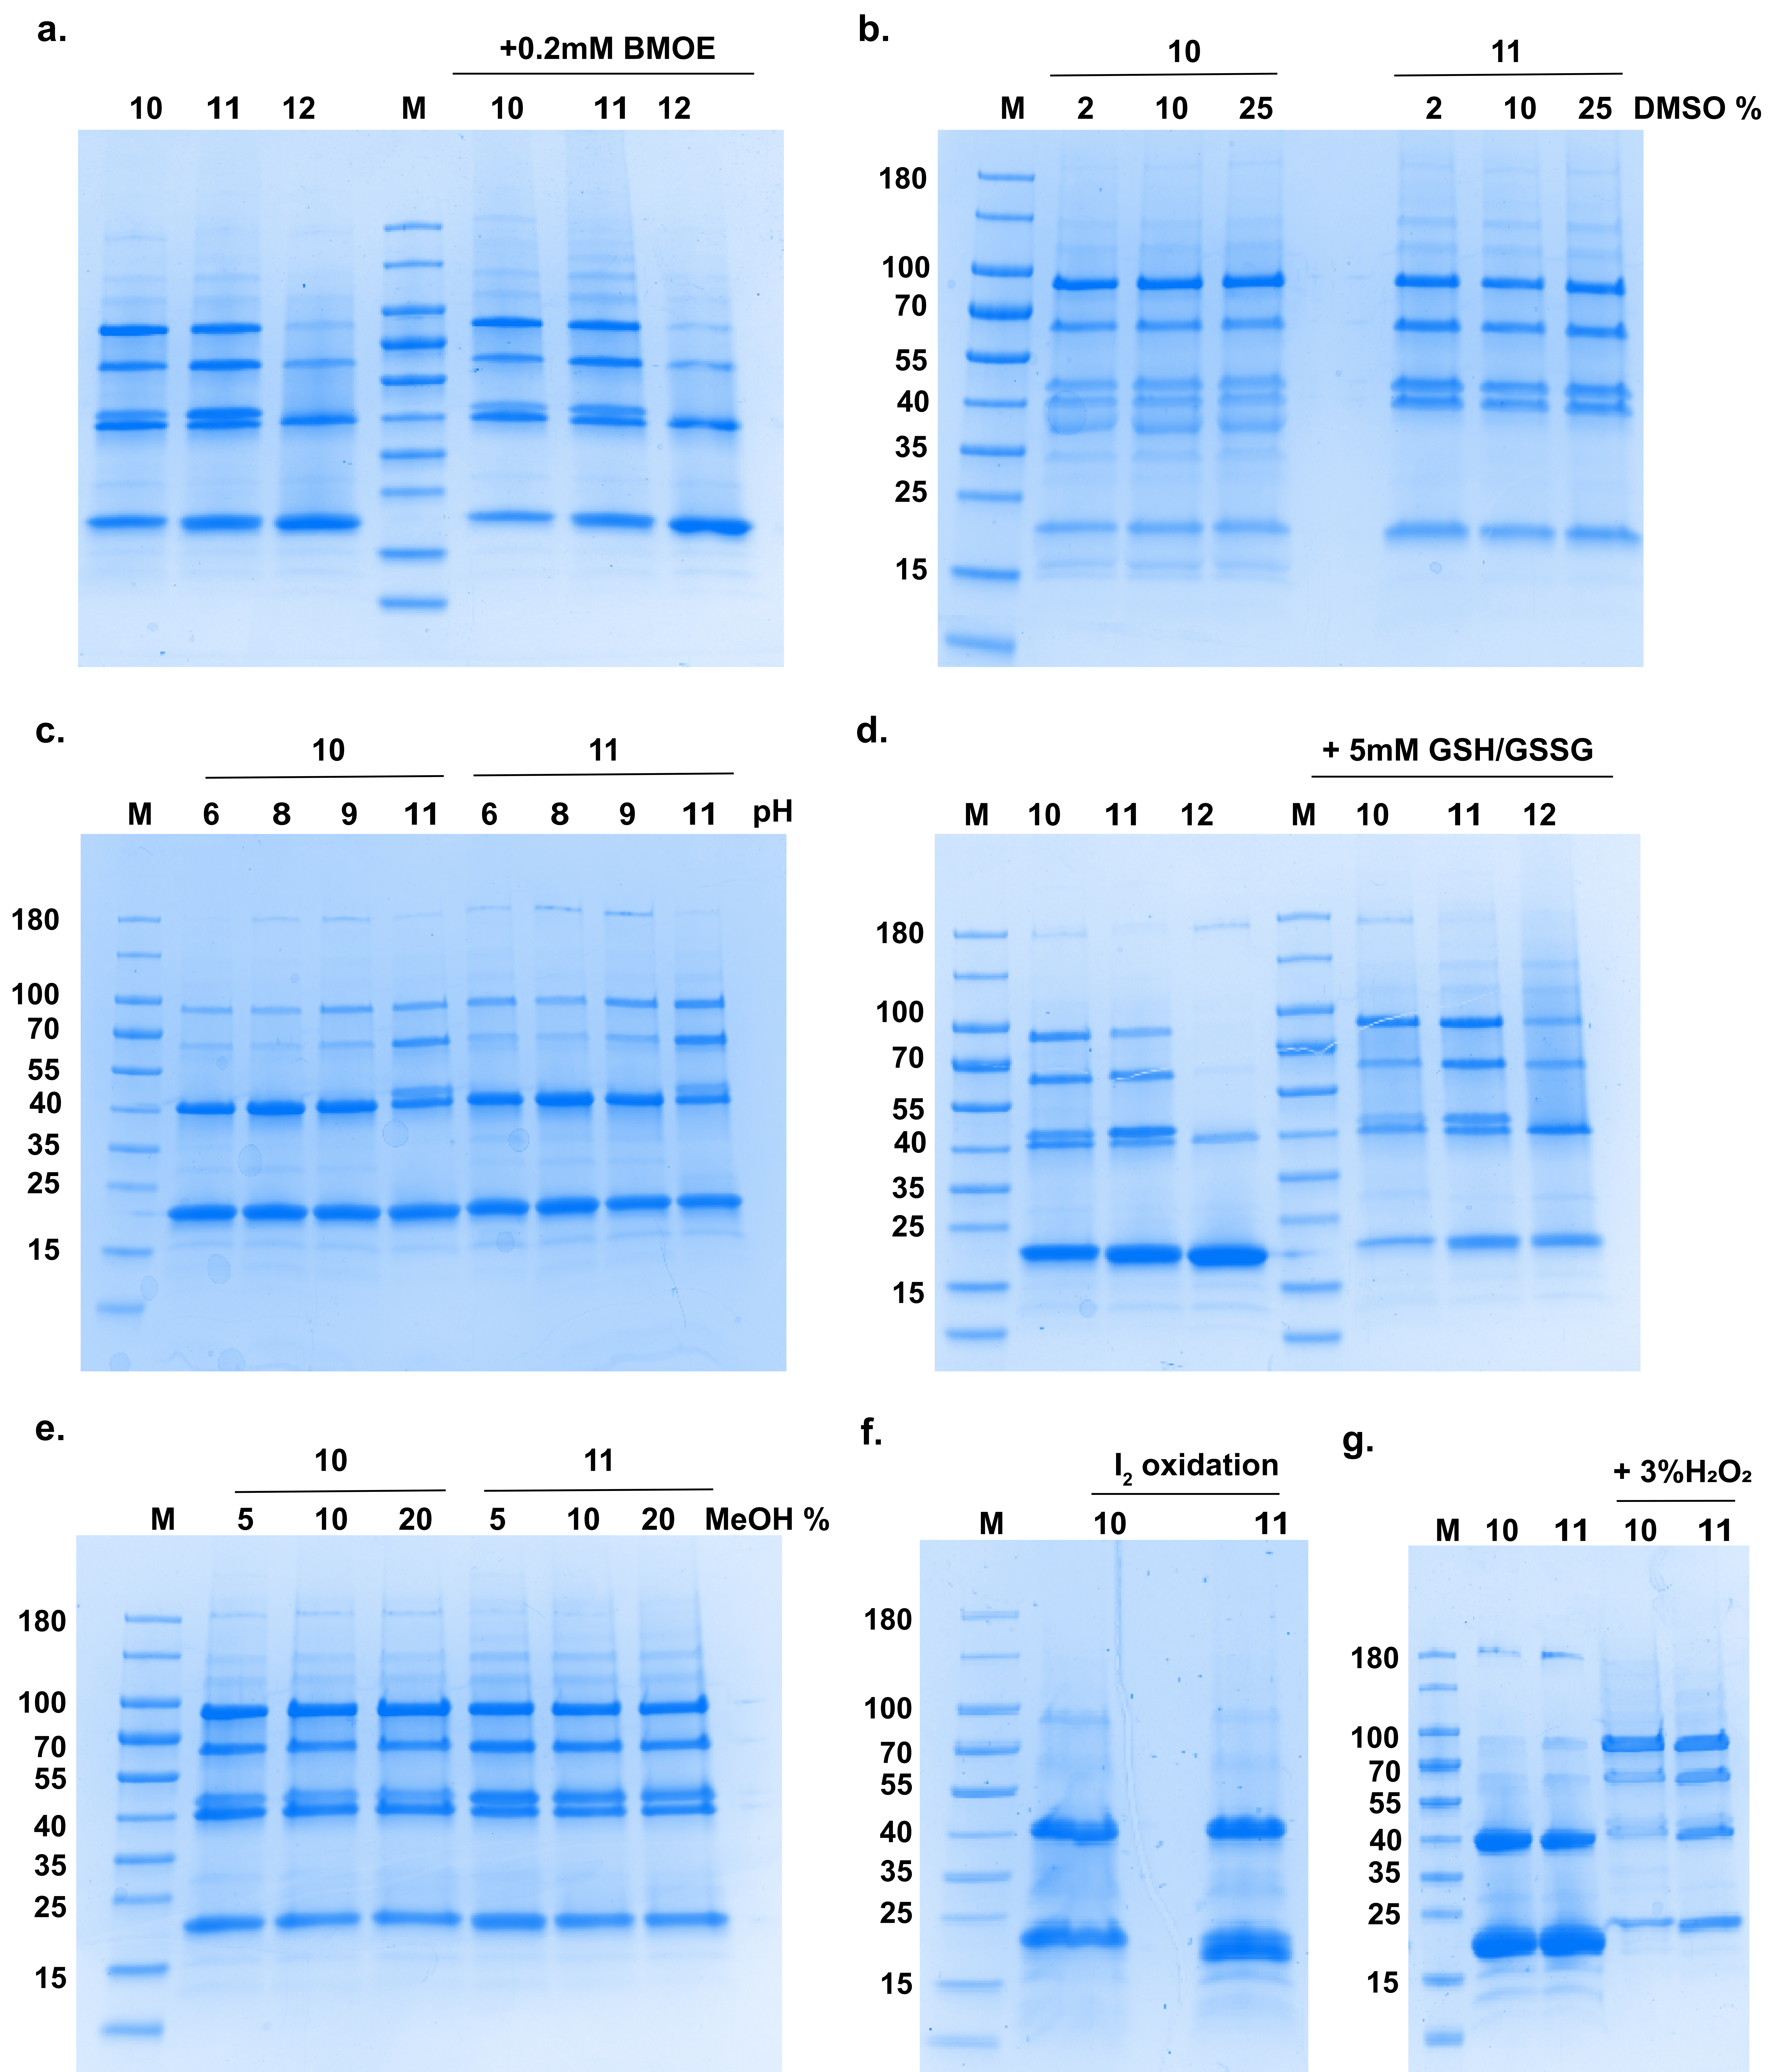

9. tES A152C - A74C - R66C  
 10. tES A152C - G67C  
 11. tES A152C - L53C - G67C  
 M. Marker

**Figure S2. (a-g)** Non-reducing SDS-PAGE to increase disulfide formation in 9,10, and 11 constructs.

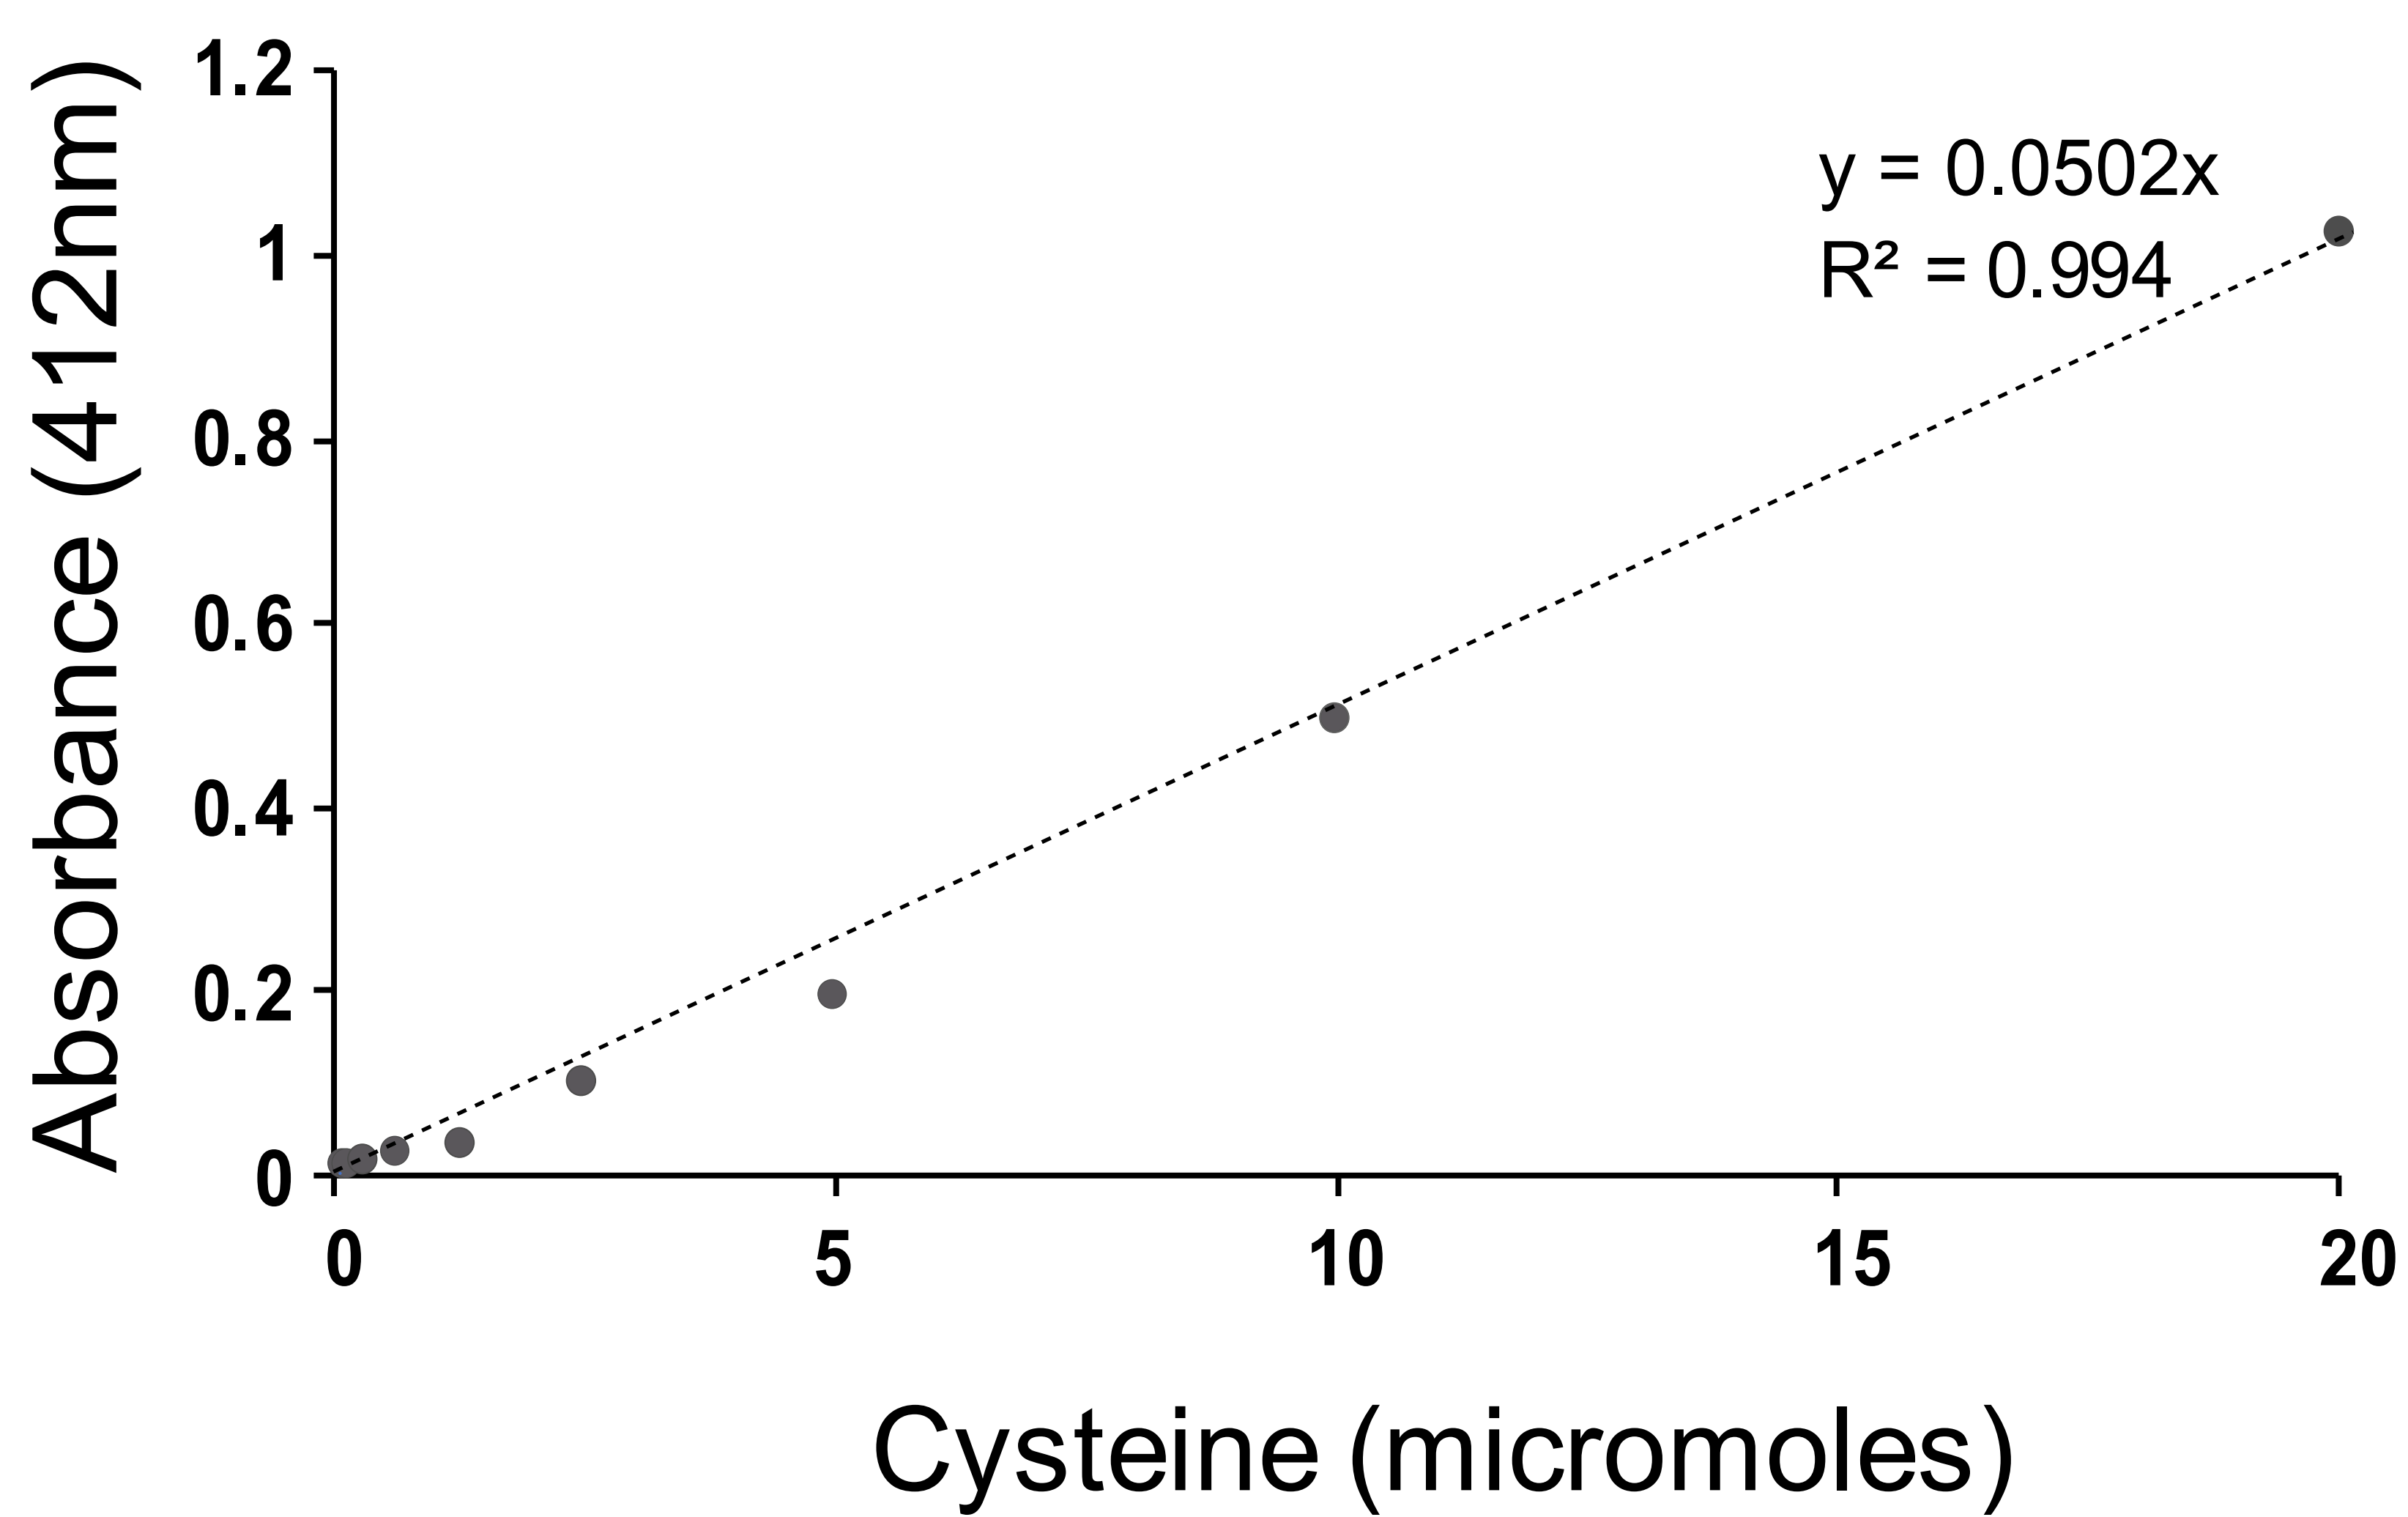

**Figure S3.** Ellman's Assay Standard Curve.

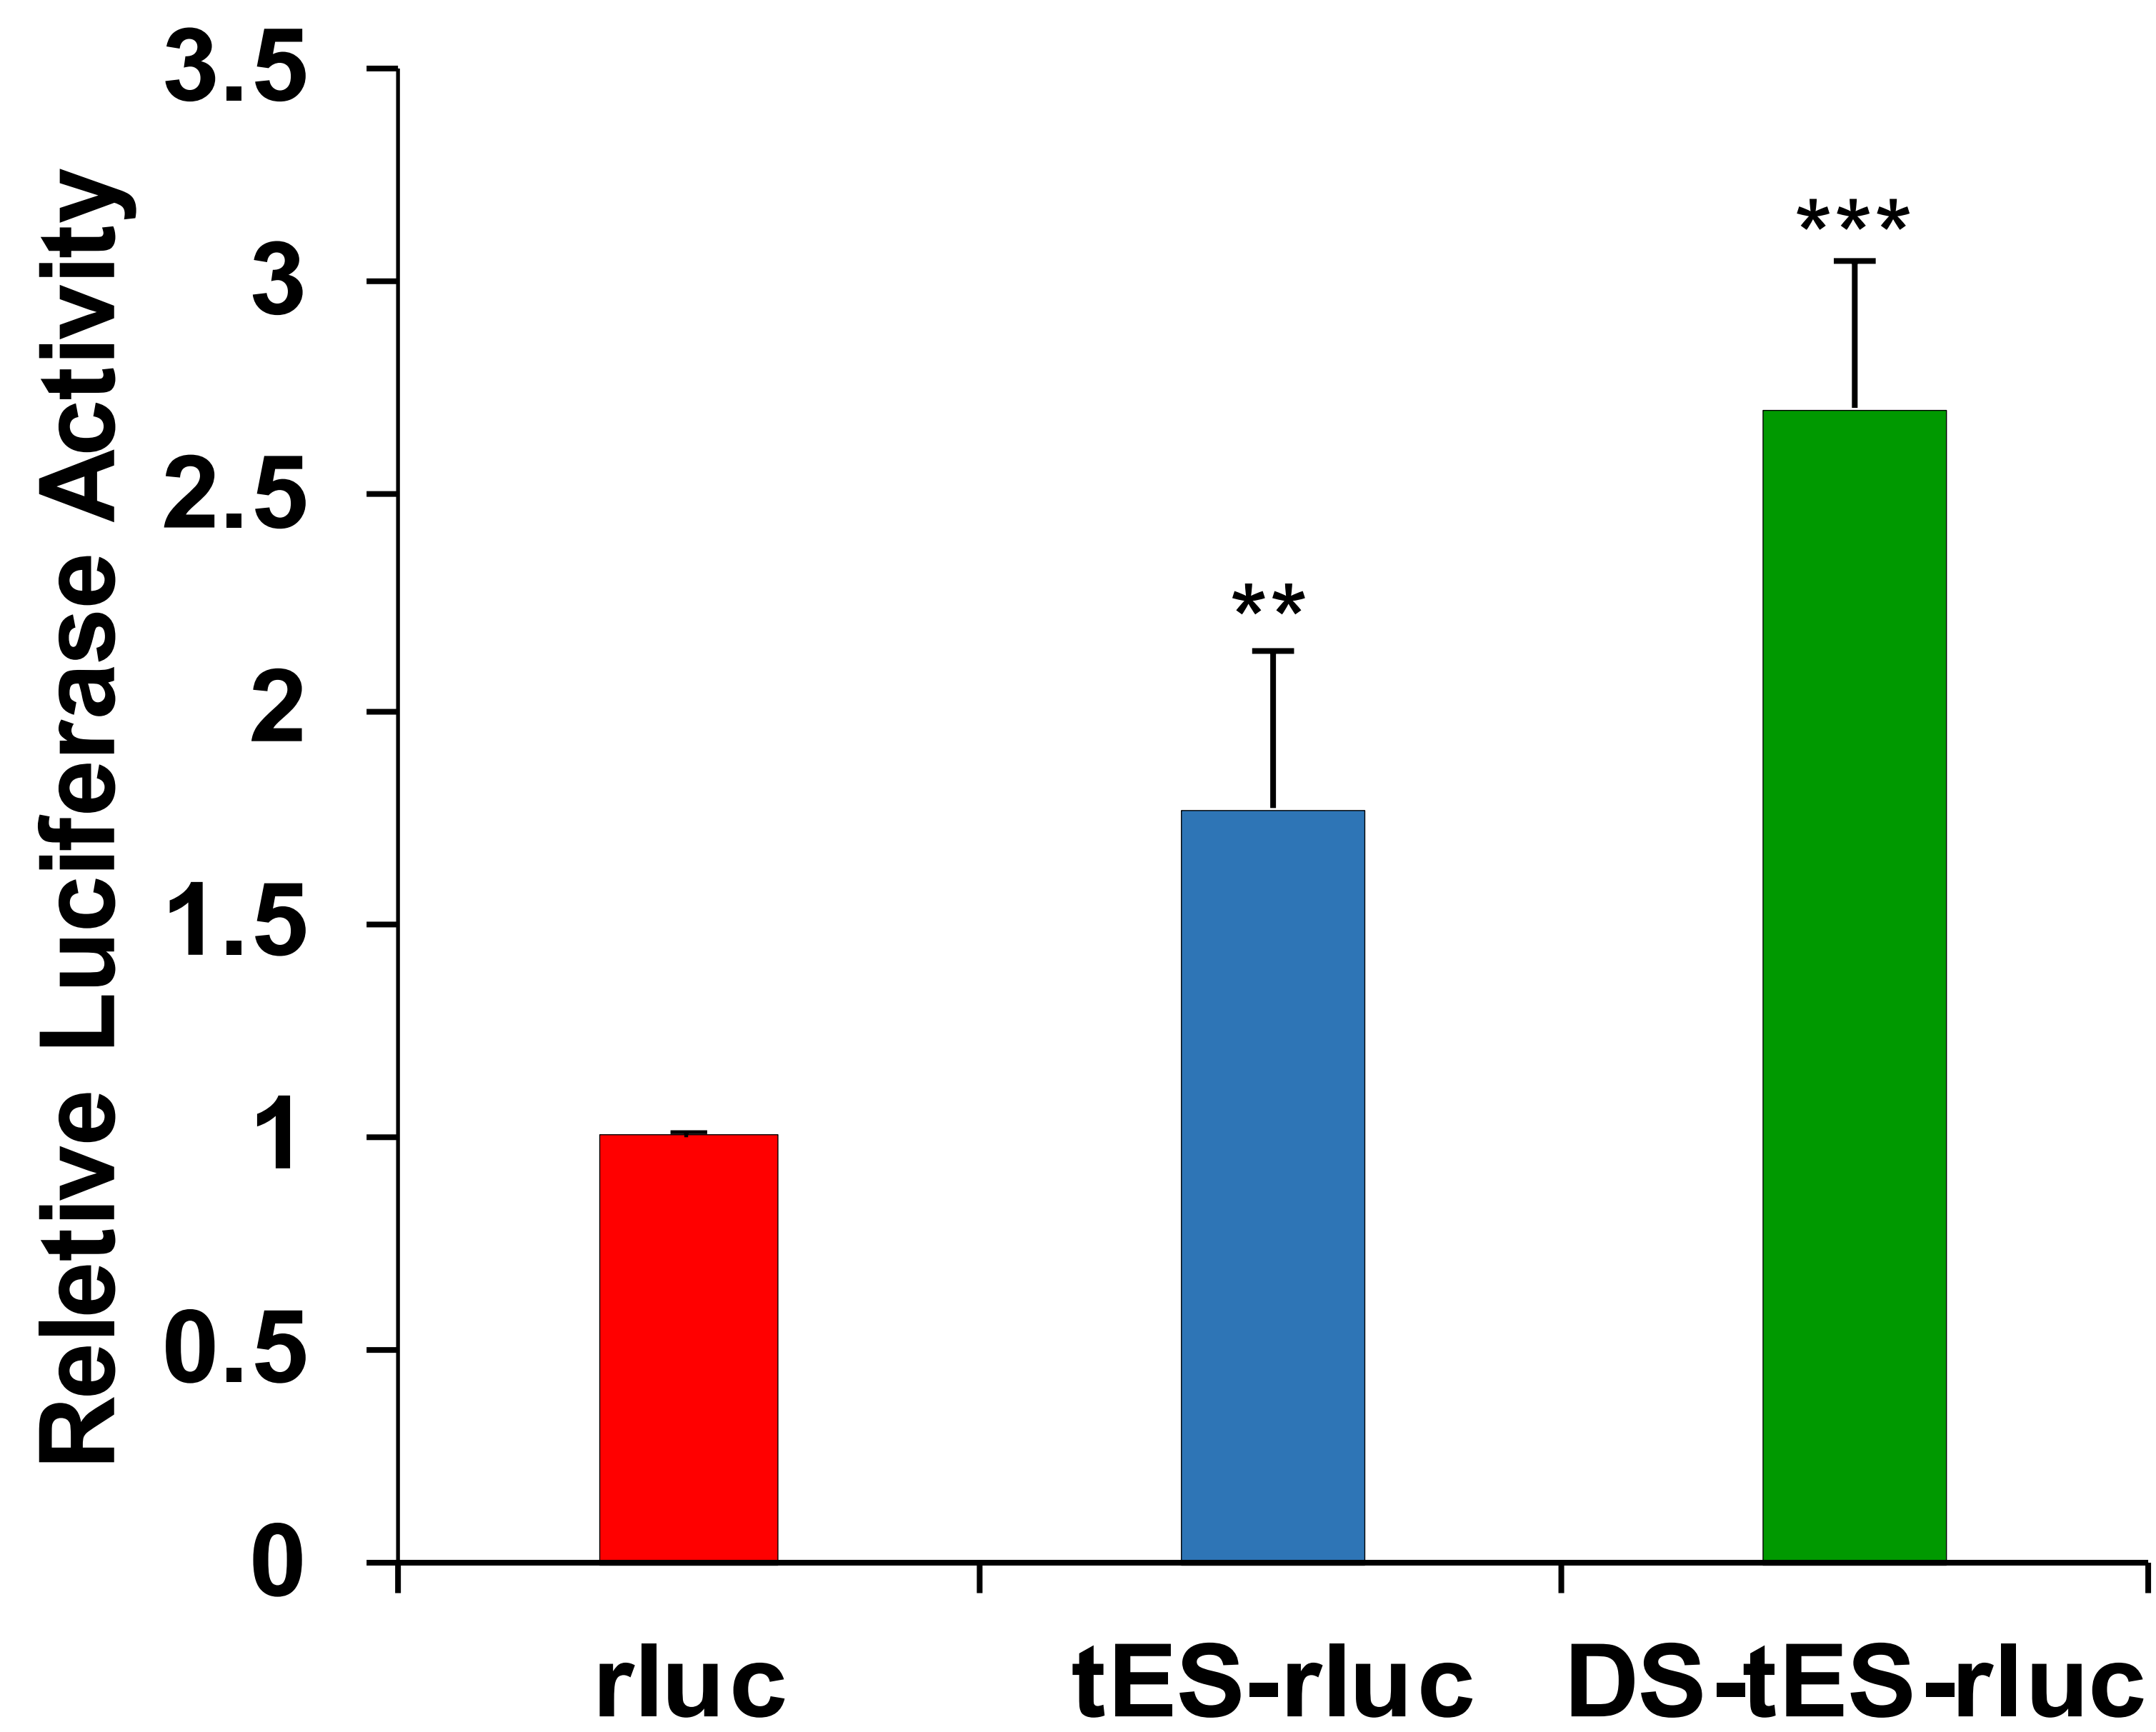

**Figure S4.** Permeability assay in Caco2 monolayers shows that both tES and DS-tES can permeabilize through intestinal epithelium. (Data are shown as mean  $\pm$  SEM, n = 3. \*\*\* P < 0.001. and \*\* P < 0.01)



a.

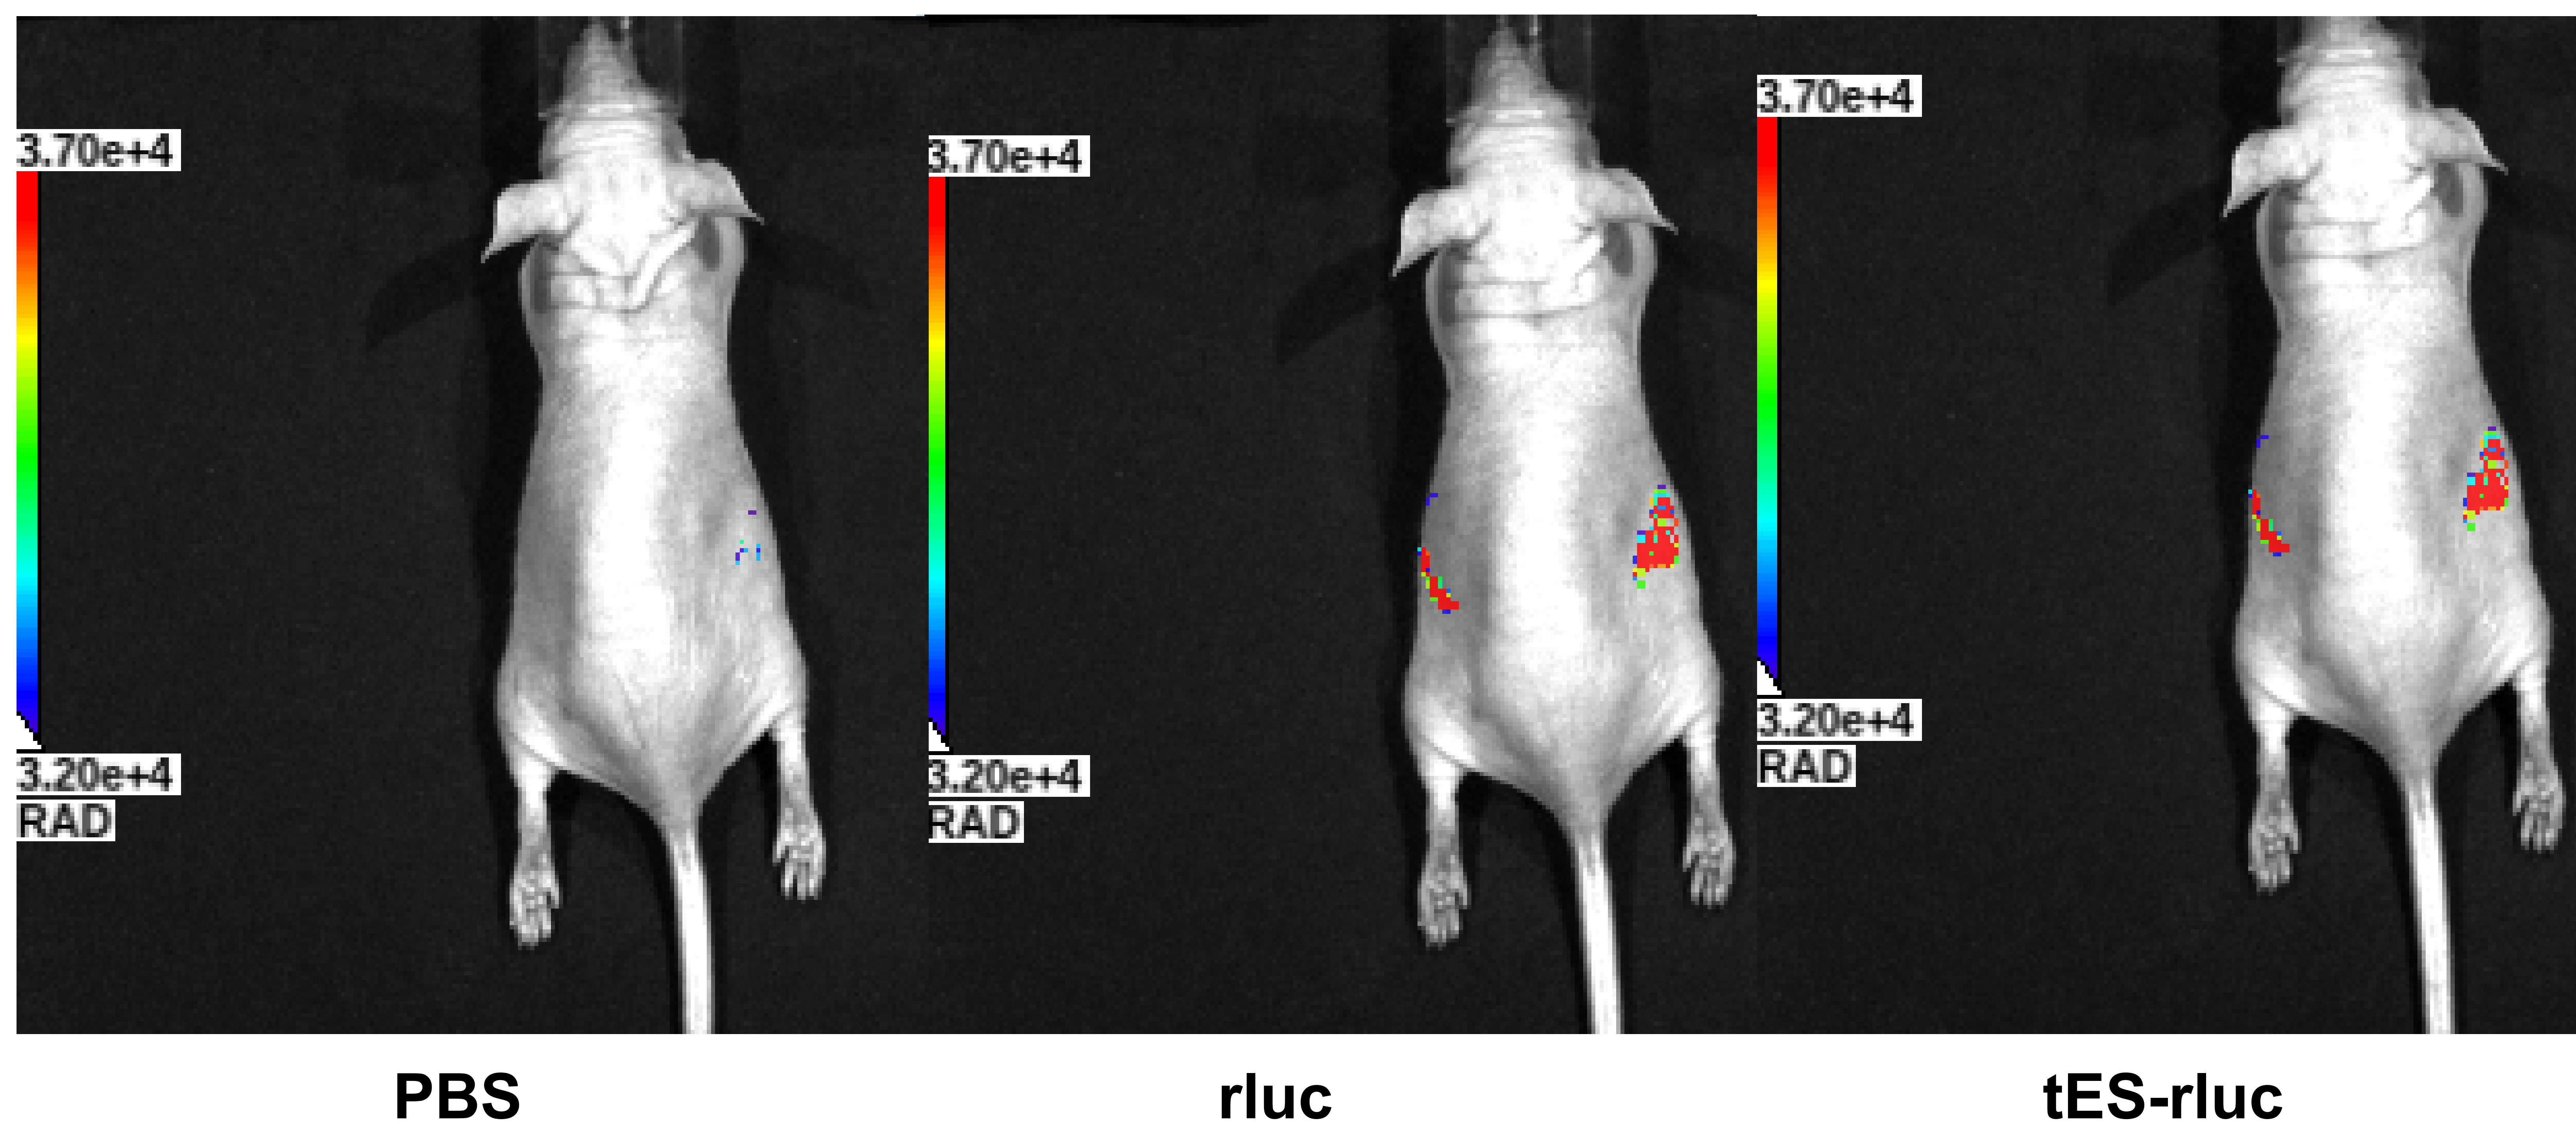

b.

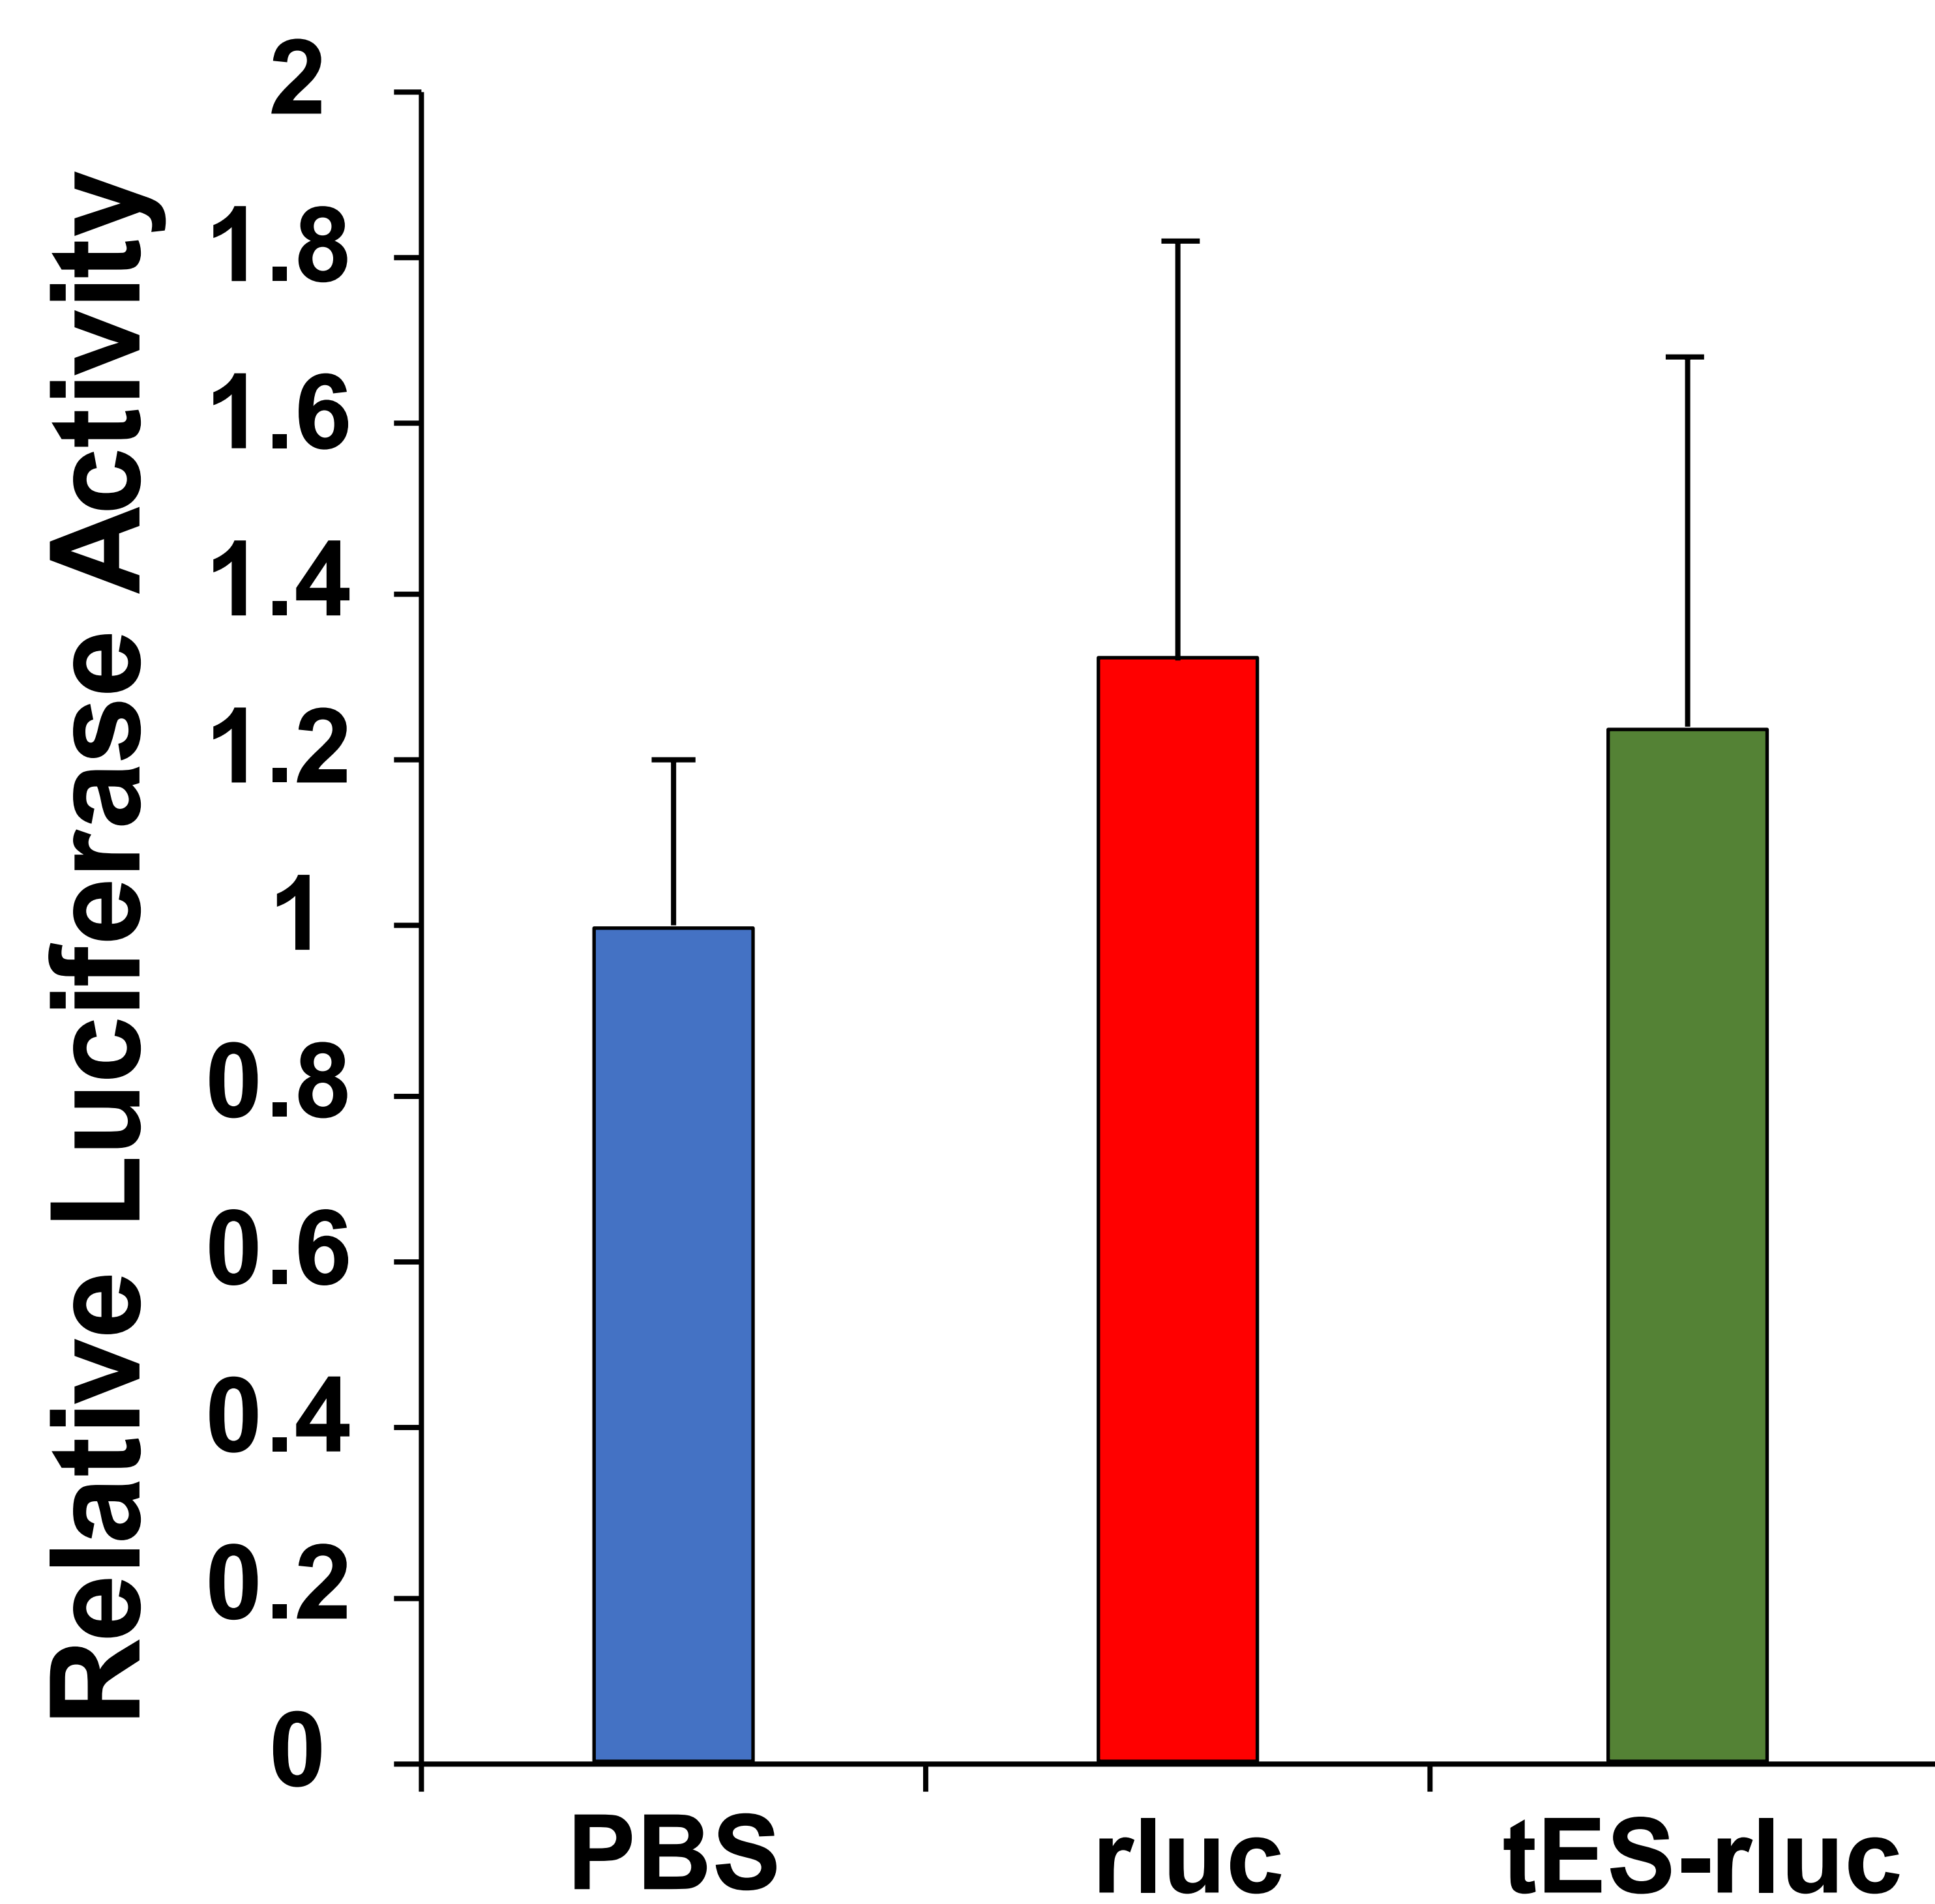

**Figure S5.(a,b)** Bioluminescence emitted from mice administered with tES-rluc/rluc in 3 h.

| <b>Features</b>                              | <b>DS-tES</b>          | <b>tES</b> |
|----------------------------------------------|------------------------|------------|
| <b>Number of cysteine per subunit</b>        | 5                      | 0          |
| <b>Non-reducing SDS-PAGE</b>                 | Majorly oxidized Shell | Subunits   |
| <b>Molecular diameter</b>                    | ~13 nm                 | ~13 nm     |
| <b>Stable at acidic pH (~4)</b>              | Yes                    | No         |
| <b>Against pepsin digestion at acidic pH</b> | Highly stable          | Not stable |
| <b>Permeable through Caco2 monolayer</b>     | High                   | High       |

**Table S1.** Comparative analysis of DS-tES and tES
